# Supplementary material for: Molecular Investigation of the Relationship Between the Reported Frequently of Optineurin Gene Polymorphisms (T34T and M98K) and Normal Tension Glaucoma in the Turkish Population
Source: Research Square preprint supplement (doi:10.21203/rs.3.rs-8503412/v1), 2026-01-20
Supplement: Supplementary file 1 [file d191290765238a5164162514.docx]

1. **Real-time PCR**

# Within the scope of the project, oligonucleotide designs were created for SNPs with Nucleotide Database Codes rs2234968 and rs11258194, and real-time PCR analyses were performed. The primer3plus program was used for primer designs (https://www.primer3plus.com/index.html).

| **SNP ID** | **SNP variant** | **Gene** |
| --- | --- | --- |
| NM_001008212.2:c.102 rs2234968 | G>A | OPTN optineurin |
| NM_001008212.2:c.293 rs11258194 | T>A | OPTN optineurin |

| **OligoName** | **5' Sign** | **5-    Sequences     -3** | **3' Sign** | **Tm** |
| --- | --- | --- | --- | --- |
| **OPTN_NM_001008212.2:c.102G>A_F** |  | **CACAGGAAATGGACCC** |  | **64 oC** |
| **OPTN_NM_001008212.2:c.102G>A_R1** |  | **GGTTCTCGGTCAGGAG** |  |
| **OPTN_NM_001008212.2:c.102G>A_P1** | **FAM** | **ACCTGGACACGTTTACCCCG** | **BHQ1** |
| **OPTN_NM_001008212.2:c.102G>A_P2** | **HEX** | **ACCTGGACACATTTACCCCG** | **BHQ2** |
| **OPTN_NM_001008212.2:c.293T>A_F** |  | **CAGAGCAAAGAAGCAAAA** |  | **64 oC** |
| **OPTN_NM_001008212.2:c.293T>A_R** |  | **CACCTCAGATGACCTTTC** |  |
| **OPTN_NM_001008212.2:c.293T>A_P1** | **FAM** | **AGCGTCTAATGGCCTTGAGTC** | **BHQ1** |
| **OPTN_NM_001008212.2:c.293T>A_P2** | **HEX** | **AGCGTCTAAAGGCCTTGAGTC** | **BHQ2** |

| **Sample Code** | **Sample Name** | **293T**  **(M98K)** | **102G**  **(T34T)** |
| --- | --- | --- | --- |
| 1 | C1 | TT | GA |
| 2 | C2 | TA | GA |
| 3 | C3 | TA | GA |
| 4 | C4 | TA | GG |
| 5 | C5 | TT | AA |
| 6 | P1 | TT | GA |
| 7 | P2 | TT | GA |
| 8 | C6 | TT | GA |
| 9 | C7 | TA | AA |
| 10 | C8 | TT | GA |
| 11 | P3 | TT | GA |
| 12 | P4 | TT | GG |
| 13 | P5 | TT | GA |
| 14 | C9 | TT | GA |
| 15 | P6 | TT | GA |
| 16 | C10 | TT | GG |
| 17 | P7 | TT | GG |
| 18 | P8 | TT | AA |
| 19 | P9 | TT | GG |
| 20 | C11 | TT | GG |
| 21 | P10 | TT | GG |
| 22 | P11 | TT | GG |
| 23 | C12 | TT | GG |
| 24 | C13 | TT | GA |
| 25 | C14 | TT | GA |
| 26 | C15 | TT | GG |
| 27 | P12 | TA | GG |
| 28 | P13 | TT | GG |
| 29 | P14 | TT | GA |
| 30 | C16 | TT | GA |
| 31 | P15 | TT | GA |
| 32 | C17 | TA | GG |
| 33 | C18 | TT | GA |
| 34 | C19 | TT | GG |
| 35 | C20 | TT | GG |
| 36 | C21 | TT | GG |
| 37 | C22 | TA | GG |
| 38 | C23 | TT | AA |
| 39 | C24 | TT | GA |
| 40 | C25 | TT | GG |
| 41 | C26 | TT | AA |
| 42 | C27 | TT | GA |
| 43 | C28 | TT | GG |
| 44 | C29 | TT | GA |
| 45 | C30 | TT | GG |
| 46 | C31 | TT | GG |
| 47 | C32 | TT | GA |
| 48 | C33 | TT | GG |
| 49 | C34 | TA | GA |
| 50 | C35 | TT | AA |
| 51 | P16 | TT | GA |
| 52 | P17 | TT | GA |
| 53 | C36 | TT | GA |
| 54 | C37 | TT | GA |
| 55 | C38 | TT | AA |
| 56 | C39 | TT | GG |
| 57 | P18 | TT | GA |
| 58 | C40 | TT | GA |
| 59 | C41 | TT | GA |
| 60 | C42 | TT | GA |
| 61 | C43 | AA | GG |
| 62 | C44 | TT | GA |
| 63 | C45 | TT | GA |
| 64 | C46 | TT | GA |
| 65 | C47 | TT | GG |
| 66 | C48 | TT | AA |
| 67 | P19 | TT | GG |
| 68 | C49 | TT | AA |
| 69 | C50 | TT | GG |
| 70 | C51 | TT | GG |
| 71 | P20 | TT | AA |
| 72 | C52 | TT | AA |
| 73 | C53 | TT | GA |
| 74 | C54 | TT | GA |
| 75 | P21 | TT | GA |
| 76 | C55 | TT | GA |
| 77 | C56 | TT | GG |
| 78 | C57 | TT | GG |
| 79 | C58 | TT | AA |
| 80 | C59 | TA | GA |
| 81 | C60 | TA | GA |
| 82 | P22 | TT | GA |
| 83 | C61 | TT | AA |
| 84 | C62 | TT | GA |
| 85 | C63 | TT | GA |
| 86 | C64 | TT | GA |
| 87 | C65 | TT | GA |
| 88 | C66 | TT | GG |
| 89 | C67 | TT | GG |
| 90 | C68 | TT | GG |
| 91 | C69 | TT | GG |
| 92 | P23 | TT | GA |
| 93 | C70 | TT | GG |
| 94 | C71 | TT | GA |
| 95 | C72 | TT | GA |
| 96 | C73 | TT | GA |
| 97 | C74 | TT | GG |
| 98 | C75 | TT | GA |
| 99 | C76 | TT | GA |
| 100 | C77 | TT | GG |
| 101 | C78 | TT | GG |
| 102 | C79 | TT | GG |
| 103 | C80 | TT | GA |
| 104 | P24 | TT | GA |
| 105 | C81 | TT | GG |
| 106 | P25 | TT | GA |
| 107 | C82 | TT | GA |
| 108 | C83 | TT | GA |
| 109 | P26 | TT | AA |
| 110 | P27 | TT | AA |
| 111 | P28 | TT | GA |
| 112 | P29 | TT | GA |
| 113 | P30 | TT | GG |
| 114 | P31 | TT | GG |
| 115 | C84 | TT | GG |
| 116 | P32 | TT | GG |
| 117 | C85 | TT | GA |
| 118 | C86 | TT | GA |
| 119 | P33 | TT | GA |
| 120 | P34 | TT | GG |
| 121 | P35 | TT | GG |
| 122 | P36 | TT | GG |
| 123 | P37 | TA | GA |
| 124 | P38 | TT | GG |
| 125 | P39 | TT | AA |
| 126 | P40 | TT | GG |
| 127 | P41 | TT | GG |
| 128 | C87 | TT | GA |
| 129 | C88 | TT | AA |
| 130 | C89 | TA | GA |
| 131 | P42 | TA | GA |
| 132 | C90 | TT | GG |
| 133 | C91 | TT | GG |
| 134 | P43 | TT | GG |
| 135 | C92 | TT | GG |
| 136 | C93 | TT | GG |
| 137 | C94 | TT | GG |
| 138 | C95 | TT | GG |
| 139 | C96 | TT | GA |
| 140 | P44 | TT | GA |
| 141 | C97 | TT | GG |
| 142 | P45 | TT | GG |
| 143 | P46 | TT | GG |
| 144 | P47 | TT | AA |
| 145 | P48 | TA | GG |
| 146 | P49 | AA | GG |
| 147 | C98 | TT | GA |
| 148 | P50 | TT | GG |
| 149 | P51 | TT | GA |
| 150 | P52 | TT | GG |
| 151 | P53 | TT | AA |
| 152 | P54 | TT | GA |
| 153 | P55 | TT | AA |
| 154 | P56 | TT | GA |
| 155 | P57 | TT | GG |
| 156 | P58 | TT | GG |
| 157 | P59 | TT | GA |
| 158 | P60 | TT | GA |
| 159 | P61 | TT | GG |
| 160 | P62 | TT | GG |
| 161 | P63 | TT | GA |
| 162 | P64 | TA | GG |
| 163 | P65 | TT | GG |
| 164 | C99 | TT | GG |
| 165 | P66 | TT | GA |
| 166 | C100 | TT | GG |
| 167 | P67 | TT | GG |
| 168 | P68 | TT | GA |
| 169 | P69 | TT | GA |
| 170 | P70 | TT | GA |
| 171 | P71 | TT | GA |
| 172 | P72 | TT | GA |
| C: Control, P: Patient | | | |
